# Supplementary material for: Comprehensive Elemental Profiling of Romanian Honey: Exploring Regional Variance, Honey Types, and Analyzed Metals for Sustainable Apicultural and Environmental Practices
Source: MDPI journal article supplement (doi:10.3390/foods13081253), 2024-04-19
Supplement: s1 [file s1]

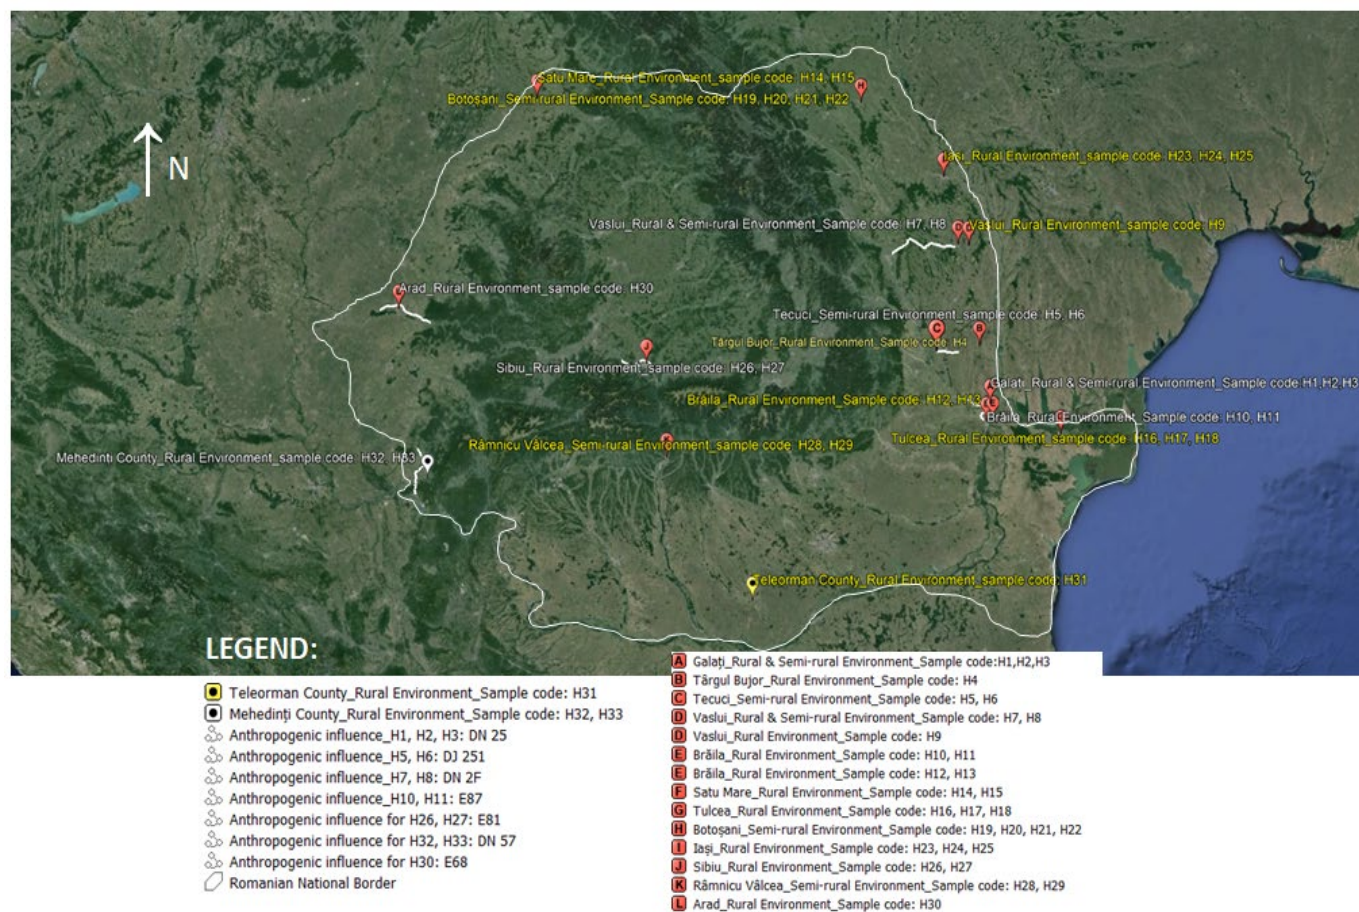

**Figure S1.** Geographic distribution of honey samples and identified pollutions sources

**Table S1.** Macroelements and microelements concentrations reported in various studies from honey.

| No of<br>Items | Denomination                                     | Country | Location                  | No. of<br>samples | Method               | Macroelements   |                  |                  |                  | Microelements: Trace Elements |                  |                  |                  |                  |                  |                 |      | Ref. |
|----------------|--------------------------------------------------|---------|---------------------------|-------------------|----------------------|-----------------|------------------|------------------|------------------|-------------------------------|------------------|------------------|------------------|------------------|------------------|-----------------|------|------|
|                |                                                  |         |                           |                   |                      | <sup>19</sup> K | <sup>23</sup> Na | <sup>24</sup> Mg | <sup>43</sup> Ca | <sup>7</sup> Li               | <sup>27</sup> Al | <sup>56</sup> Fe | <sup>64</sup> Cu | <sup>65</sup> Zn | <sup>88</sup> Sr | <sup>9</sup> Be |      |      |
| 1.             | Acacia                                           | Romania | Domasnea                  | 3                 | AAS<br>ppm           | 95.95           | 26.062           | 20.350           | 185.80           |                               |                  | 2.7955           | 0.1435           | < 0.125          |                  |                 | [32] |      |
|                |                                                  |         | Farliug                   |                   |                      | 116.00          | 28.080           | 21.260           | 197.10           | –                             | –                | 3.7795           | 0.1885           | 0.2305           | –                | –               |      |      |
|                |                                                  |         | Bala                      |                   |                      | 100.90          | 27.165           | 21.005           | 195.05           |                               |                  | 4.8055           | 0.0955           | 0.4200           |                  |                 |      |      |
| 2.             | Acacia, Lime, sunflower,<br>and polyfloral honey |         | Dolj<br>Mehedinți<br>Gorj | –                 | AAS<br>ppm           | 356-<br>735     | 1.94-<br>51.06   | 7.05-<br>23.07   | 5.8-<br>76.46    | –                             | –                | 1.13-<br>7.34    | 0.15-<br>0.56    | < 0.03-<br>1.86  | –                | –               | [33] |      |
|                |                                                  |         |                           |                   |                      |                 |                  |                  |                  |                               |                  |                  |                  |                  |                  |                 |      |      |
| 3.             | Polyfloral                                       |         | Copșa Mică                | –                 | FAAS<br>GFAAS        | –               | –                | –                | –                | –                             | –                | –                | 2.00-<br>33.00   | 15.00-<br>36.40  | –                | –               | [34] |      |
|                |                                                  |         |                           |                   | mg/kg                |                 |                  |                  |                  |                               |                  |                  |                  |                  |                  |                 |      |      |
| 4.             | Mixed Flowers P1                                 |         | Timiș                     | –                 | AAS<br>ppm           | –               | –                | –                | –                | –                             | –                | 10.49            | 18.89            | 0.978            | –                | –               | [35] |      |
|                | Mixed Flowers P0                                 |         |                           |                   |                      | –               | –                | –                | –                | –                             | –                | 17               | 39.55            | -                | –                | –               |      |      |
|                | Linden P1                                        |         |                           |                   |                      | –               | –                | –                | –                | –                             | –                | 80.32            | 35.543           | -                | –                | –               |      |      |
|                | Linden P0                                        |         |                           |                   |                      | –               | –                | –                | –                | –                             | –                | 67.89            | 75.5             | 0.1477           | –                | –               |      |      |
|                | Rape                                             |         |                           |                   |                      | –               | –                | –                | –                | –                             | –                | 47.24            | 48.17            | 0.336            | –                | –               |      |      |
|                | Acacia                                           |         |                           |                   |                      | –               | –                | –                | –                | –                             | –                | 23.18            | 10.73            | 1.48             | –                | –               |      |      |
| 5.             | Knotweed                                         |         | Banat                     | 10                | AAS<br>mg/kg         | 81.332          | 7.673            | 35.280           | 32.521           | –                             | –                | 4.261            | 4.272            | 3.133            | –                | –               | [36] |      |
|                | Linden                                           |         |                           |                   |                      | 85.706          | 12.510           | 40.700           | 70.547           | –                             | –                | 8.457            | 5.139            | 3.881            | –                | –               |      |      |
|                | Acacia                                           |         |                           |                   |                      | 56.749          | 13.025           | 35.179           | 37.370           | –                             | –                | 7.284            | 6.986            | 4.550            | –                | –               |      |      |
|                | Oilseed rape                                     |         |                           |                   |                      | 82.367          | 7.571            | 39.846           | 67.473           | –                             | –                | 6.237            | 4.505            | 2.780            | –                | –               |      |      |
|                | Sunflower                                        |         |                           |                   |                      | 65.089          | 8.203            | 38.097           | 54.280           | –                             | –                | 7.218            | 5.037            | 3.177            | –                | –               |      |      |
| 6.             | Acacia                                           |         | Bihor                     | 6                 | ICP-<br>OES<br>mg/kg | 213.522         | –                | 3.128            | 45.160           | –                             | 0.049            | 0.396            | 0.347            | 0.371            | –                | –               | [37] |      |
|                | Honeydew                                         |         |                           | 18                |                      | 1201.296        | –                | 46.392           | 523.940          | –                             | 1.197            | 1.923            | 0.655            | 2.158            | –                | –               |      |      |
|                | Heather                                          |         |                           | 6                 |                      | 1680.685        | –                | 47.449           | 284.473          | –                             | 2.696            | 1.594            | 0.866            | 3.141            | –                | –               |      |      |
|                | Lime                                             |         |                           | 6                 |                      | 507.152         | –                | 23.619           | 501.040          | –                             | 0.366            | 0.598            | 0.493            | 1.952            | –                | –               |      |      |
| 7.             | Polyfloral                                       |         | Baia Mare                 | –                 | FAAS<br>mg/kg        | –               | –                | –                | –                | –                             | –                | –                | 0.20-<br>0.32    | 0.89-<br>1.39    | –                | –               | [38] |      |
| 8.             | Multifloral                                      | Italy   | Lazio                     | 40                | ICP-<br>OES<br>μg/g  | 237-<br>6520    | 4.8-176          | 6.2-148          | < 43-<br>283     | 1.1-24                        | < 0.3-9.2        | < 1-4.4          | < 0.06-<br>5.4   | < 0.5-<br>8.9    | 0.04-<br>2.8     | 0.06-<br>1.1    | [39] |      |

|     |             |          |               |     |                   |          |           |             |             |           |           |           |            |           |           |      |      |
|-----|-------------|----------|---------------|-----|-------------------|----------|-----------|-------------|-------------|-----------|-----------|-----------|------------|-----------|-----------|------|------|
| 9.  | Unifloral   | Bulgaria | –             | 200 | ICP-AES<br>mg/kg  | 126-1628 | 7.22-16.3 | 4.8-97      | 32-110      | –         | 0.35-1.58 | 0.35-4.37 | <0.01-0.45 | 0.08-1.04 | 0.11-0.40 | –    | [40] |
| 10. | Polyfloral  | France   | -             | 86  | ICP-AES<br>ppm    | –        | –         | 1.43-109.50 | 2.98-108.50 | 0.02-0.24 | 0.05-1.44 | 0.13-10   | 0.03-2.30  | 0.04-5.96 | –         | –    | [41] |
| 11. | Fir         | Greek    | Messinia      | 207 | ICP-OES<br>mg/kg  | –        | –         | 79.05       | 25.79       | –         | 23.78     | 4.03      | 0.77       | 1.04      | –         | 0.79 | [42] |
| 12. | Lavender    | Algeria  | Sidi Djillali | 37  | AAS<br>(mg/kg)    | 808.00   | 21.60     | 142.00      | 56.20       | –         | –         | 59.60     | 3.66       | 2.62      | –         | –    | [43] |
|     | Rosemary    |          |               |     |                   | 460.00   | 49.20     | 126.00      | 58.50       | –         | –         | 24.50     | 5.70       | 2.39      | –         | –    |      |
|     | Multifloral |          |               |     |                   | 418.00   | 37.00     | 142.00      | 64.90       | –         | –         | 24.40     | 4.46       | 4.41      | –         | –    |      |
| 13. | Acacia      | Hungary  | –             | 187 | MP-AES<br>(mg/kg) | 327.9    | 23.5      | 10.4        | 28.1        | –         | 1.6       | –         | –          | 2.6       | –         | –    | [44] |
|     | Honeydew    |          |               |     |                   | 2069.1   | 62.2      | 118.7       | 134.4       | –         | 1.0       | –         | –          | 2.5       | –         | –    |      |
|     | Forest      |          |               |     |                   | 1892.7   | 46.1      | 71.5        | 121.5       | –         | 1.8       | –         | –          | 4.2       | –         | –    |      |
|     | Sunflower   |          |               |     |                   | 217.7    | 55.1      | 49.7        | 217.7       | –         | 11.5      | –         | –          | 5.5       | –         | –    |      |
|     | Chestnut    |          |               |     |                   | 2466.3   | 43.2      | 52.3        | 161.4       | –         | 1.5       | –         | –          | 1.2       | –         | –    |      |
|     | Rape        |          |               |     |                   | 399.4    | 22.8      | 19.2        | 68.6        | –         | 2.2       | –         | –          | 2.3       | –         | –    |      |
|     | Multifloral |          |               |     |                   | 696.5    | 17.4      | 29.5        | 110.9       | –         | 1.4       | –         | –          | 3.1       | –         | –    |      |

**Table S2.** Microelements concentrations reported in various studies from honey.

[illegible]

|     |                     |          |            |     |                        |        |                  |                |               |                 |   |       |   |               |             |   |   |                |      |
|-----|---------------------|----------|------------|-----|------------------------|--------|------------------|----------------|---------------|-----------------|---|-------|---|---------------|-------------|---|---|----------------|------|
| 3.  | Polyfloral          |          | Copşa Mică | –   | FAAS<br>GFAAS<br>mg/kg | –      | –                | –              | –             | –               | – | –     | – | –             | –           | – | – | [34]           |      |
| 4.  | Mixed Flowers<br>P1 |          | Timiș      | –   | AAS<br>ppm             | –      | –                | 0.512          | –             | –               | – | –     | – | –             | –           | – | – | [35]           |      |
|     | Mixed Flowers<br>P0 | –        |            |     |                        | –      | 0.044            | –              | –             | –               | – | –     | – | –             | –           | – |   |                |      |
|     | Linden P1           | –        |            |     |                        | 10.34  | 2.526            | –              | 7.64          | –               | – | –     | – | –             | –           | – |   |                |      |
|     | Linden P0           | –        |            |     |                        | 6.875  | 4.803            | –              | 0.664         | –               | – | –     | – | –             | –           | – |   |                |      |
|     | Rape                | –        |            |     |                        | –      | 1.284            | –              | –             | –               | – | –     | – | –             | –           | – |   |                |      |
|     | Acacia              | –        |            |     |                        | –      | 6.31             | –              | –             | –               | – | –     | – | –             | –           | – | – |                |      |
| 5.  | Knotweed            |          | Banat      | 10  | AAS<br>mg/kg           | –      | 0.114            | 0.954          | –             | 0.220           | – | –     | – | –             | –           | – | – | [36]           |      |
|     | Linden              | –        |            |     |                        | 0.116  | 1.345            | –              | 0.233         | –               | – | –     | – | –             | –           | – |   |                |      |
|     | Acacia              | –        |            |     |                        | 0.114  | 0.902            | –              | 0.249         | –               | – | –     | – | –             | –           | – |   |                |      |
|     | Oilseed rape        | –        |            |     |                        | 0.110  | 4.999            | –              | 0.199         | –               | – | –     | – | –             | –           | – |   |                |      |
|     | Sunflower           | –        |            |     |                        | 0.108  | 0.551            | –              | 0.202         | –               | – | –     | – | –             | –           | – |   |                |      |
| 6.  | Acacia              |          | Bihor      | 6   | ICP-<br>OES<br>mg/kg   | –      | 0.030            | 1.103          | –             | 0.046           | – | –     | – | –             | –           | – | – | [37]           |      |
|     | Honeydew            | 18       |            | –   |                        | 0.022  | 4.274            | –              | 0.125         | –               | – | –     | – | –             | –           | – |   |                |      |
|     | Heather             | 6        |            | –   |                        | 0.013  | 5.724            | –              | 0.398         | –               | – | –     | – | –             | –           | – |   |                |      |
|     | Lime                | 6        |            | –   |                        | 0.007  | 1.391            | –              | ND            | –               | – | –     | – | –             | –           | – |   |                |      |
| 7.  | Polyfloral          |          | Baia Mare  | –   | FAAS<br>mg/kg          | –      | –                | –              | –             | –               | – | –     | – | –             | –           | – | – | [38]           |      |
| 8.  | Multifloral         | Italy    | Lazio      | 40  | ICP-<br>OES<br>µg/g    | < 3-24 | 10-328           | 0.09-<br>2.8   | 1.0-17        | 0.05-<br>0.40   | – | 33-74 | – | –             | 0.1-<br>150 | – | – | < 0.03-<br>1.4 | [39] |
| 9.  | Unifloral           | Bulgaria | -          | 200 | ICP-<br>AES<br>mg/kg   | < 0.05 | < 0.01-<br>0.012 | –              | < 0.01        | < 0.01-<br>1.00 | – | –     | – | –             | –           | – | – | –              | [40] |
| 10. | Polyfloral          | France   | –          | 86  | ICP-<br>AES<br>ppm     | –      | 0.05-<br>0.52    | 0.06-<br>10.34 | 0.03-<br>0.25 | ND              | – | –     | – | 0.08-<br>2.16 | –           | – | – | –              | [41] |

|     |             |         |               |     |                   |       |      |       |       |      |   |      |   |        |      |   |   |   |      |      |
|-----|-------------|---------|---------------|-----|-------------------|-------|------|-------|-------|------|---|------|---|--------|------|---|---|---|------|------|
| 11. | Fir         | Greek   | Messinia      | 207 | ICP-OES<br>mg/kg  | –     | 0.02 | 3.74  | –     | 0.38 | – | 0.18 | – | < 0.01 | 0.01 | – | – | – | 0.01 | [42] |
| 12. | Lavender    | Algeria | Sidi Djillali | 37  | ICP-MS<br>(mg/kg) | 0.009 | 0.07 | 13.30 | 0.009 | –    | – | –    | – | –      | –    | – | – | – | –    | [43] |
|     | Rosemary    |         |               |     |                   | 0.009 | 0.06 | 10.80 | 0.009 | –    | – | –    | – | –      | –    | – | – | – |      |      |
|     | Multifloral |         |               |     |                   | 0.005 | 0.04 | 11.10 | 0.010 | –    | – | –    | – | –      | –    | – | – | – |      |      |
| 13. | Acacia      | Hungary | –             | 187 | MP-AES<br>(mg/kg) | –     | –    | 3.3   | –     | –    | – | –    | – | –      | –    | – | – | – | –    | [44] |
|     | Honeydew    |         |               |     |                   | –     | –    | 5.5   | –     | –    | – | –    | – | –      | –    | – | – | – |      |      |
|     | Forest      |         |               |     |                   | –     | –    | 3.0   | –     | –    | – | –    | – | –      | –    | – | – | – |      |      |
|     | Sunflower   |         |               |     |                   | –     | –    | 0.7   | –     | –    | – | –    | – | –      | –    | – | – | – |      |      |
|     | Chestnut    |         |               |     |                   | –     | –    | 11.9  | –     | –    | – | –    | – | –      | –    | – | – | – |      |      |
|     | Rape        |         |               |     |                   | –     | –    | 0.9   | –     | –    | – | –    | – | –      | –    | – | – | – |      |      |
|     | Multifloral |         |               |     |                   | –     | –    | 2.7   | –     | –    | – | –    | – | –      | –    | – | – | – |      |      |

**Table S3.** Heavy metals concentrations reported in various studies from honey.

| No of Items | Denomination                            | Country | Location   | No. of samples | Heavy metals           |                  |                   |                   |                   |                  |      |
|-------------|-----------------------------------------|---------|------------|----------------|------------------------|------------------|-------------------|-------------------|-------------------|------------------|------|
|             |                                         |         |            |                | Method                 | <sup>75</sup> As | <sup>111</sup> Cd | <sup>201</sup> Hg | <sup>208</sup> Pb | <sup>238</sup> U | Ref. |
| 1.          | Acacia                                  | Romania | Domasnea   | 3              | AAS<br>(ppm)           | –                | ND                | –                 | ND                | –                | [32] |
|             |                                         |         | Farliug    |                |                        |                  | ND                |                   | ND                |                  |      |
|             |                                         |         | Bala       |                |                        |                  | ND                |                   | ND                |                  |      |
| 2.          | Acacia, Lime, sunflower, and polyfloral |         | Dolj       | –              | AAS<br>ppm             | –                | –                 | –                 | 0.0030            | –                | [33] |
|             |                                         |         | Mehedinți  |                |                        |                  |                   |                   |                   |                  |      |
|             |                                         |         | Gorj       |                |                        |                  |                   |                   |                   |                  |      |
| 3.          | Polyfloral                              |         | Copșa Mică | –              | FAAS<br>GFAAS<br>mg/kg | –                | 0.05-<br>3.81     | –                 | 0.76-3.41         | –                | [34] |
| 4.          | Mixed Flowers P1                        |         | Timiș      | –              | AAS<br>ppm             | –                | –                 | –                 | –                 | –                | [35] |
|             | Mixed Flowers P0                        |         |            |                |                        | –                | –                 | –                 | –                 | –                |      |
|             | Linden P1                               |         |            |                |                        | –                | –                 | –                 | –                 | –                |      |
|             | Linden P0                               |         |            |                |                        | –                | –                 | –                 | –                 | –                |      |
|             | Rape                                    |         |            |                |                        | –                | –                 | –                 | –                 | –                |      |
|             | Acacia                                  |         |            |                |                        | –                | –                 | –                 | –                 | –                |      |
| 5.          | Knotweed                                | Banat   | 10         | AAS            | –                      | 0.130            | –                 | 0.163             | –                 | [36]             |      |

|     |              |           |               |     |                   |             |         |      |             |          |      |
|-----|--------------|-----------|---------------|-----|-------------------|-------------|---------|------|-------------|----------|------|
|     | Linden       |           |               |     | mg/kg             | –           | 0.049   | –    | 0.076       | –        |      |
|     | Acacia       |           |               |     |                   | –           | 0.078   | –    | 0.109       | –        |      |
|     | Oilseed rape |           |               |     |                   | –           | 0.099   | –    | 0.118       | –        |      |
|     | Sunflower    |           |               |     |                   | –           | 0.061   | –    | 0.131       | –        |      |
| 6.  | Acacia       | Bihor     |               | 6   | ICP-OES           | –           | ND      | –    | 0.027       | –        | [37] |
|     | Honeydew     |           |               | 18  |                   | –           | ND      | –    | 0.018       | –        |      |
|     | Heather      |           |               | 6   | mg/kg             | –           | ND      | –    | 0.031       | –        |      |
|     | Lime         |           |               | 6   |                   | –           | ND      | –    | 0.050       | –        |      |
| 7.  | Polyfloral   | Baia Mare |               | –   | GFAAS mg/kg       | –           | ND-0.78 | –    | 0.12-20.34  | –        | [38] |
| 8.  | Multifloral  | Italy     | Lazio         | 40  | ICP-OES<br>µg/g   | < 25        | 1.3-4.2 | –    | 9-209       | 0.04-1.0 | [39] |
| 9.  | Unifloral    | Bulgaria  | –             | 200 | ICP-AES<br>mg/kg  | < 0.1-0.268 | < 0.1   | –    | < 0.08-0.31 | –        | [40] |
| 10. | Polyfloral   | France    | -             | 86  | ICP-AES<br>ppm    | –           | ND      | ND   | ND          | –        | [41] |
| 11. | Fir          | Greek     | Messinia      | 207 | ICP-OES<br>mg/kg  | 0.39        | –       | 0.06 | 0.13        | –        | [42] |
| 12. | Lavender     | Algeria   | Sidi Djillali | 37  | ICP-MS<br>(mg/kg) | –           | 0.001   | –    | 0.02        | –        | [43] |
|     | Rosemary     |           |               |     |                   | 0.005       | 0.0008  | –    | 0.017       | –        |      |
|     | Multifloral  |           |               |     |                   | 0.008       | 0.001   | –    | 0.010       | –        |      |
| 13. | Acacia       | Hungary   | –             | 187 | MP-AES<br>(mg/kg) | –           | –       | –    | 0.5         | –        | [44] |
|     | Honeydew     |           |               |     |                   | –           | –       | –    | 0.6         | –        |      |
|     | Forest       |           |               |     |                   | –           | –       | –    | 0.5         | –        |      |
|     | Sunflower    |           |               |     |                   | –           | –       | –    | 0.5         | –        |      |
|     | Chestnut     |           |               |     |                   | –           | –       | –    | 0.6         | –        |      |
|     | Rape         |           |               |     |                   | –           | –       | –    | 0.6         | –        |      |
|     | Multifloral  |           |               |     |                   | –           | –       | –    | 0.6         | –        |      |

Atomic absorption spectroscopy (AAS), flame atomic absorption spectrometry (FAAS), inductively coupled plasma-mass spectrometer (ICP-MS), inductively coupled plasma optical emission spectroscopy (ICP-OES), inductively coupled plasma atomic emission spectrometry (ICP-AES), microwave plasma atomic emission spectrometry (MP-AES), and graphite furnace atomic spectrometry (GFAAS).

**Table S4.** Descriptive attributes of honey samples, covering sample codes, specific qualities of honey, classification, geographical origins, harvest years, extraction methods, bee species, environmental factors, and anthropogenic influences.

| Sample code | N° of sample | Harvest period | Honey details     | Denomination | Geographical origin | Area/ Country | Year of harvest | Type of extraction | Environment | Anthropogenic influence                                                             | Bee species           |
|-------------|--------------|----------------|-------------------|--------------|---------------------|---------------|-----------------|--------------------|-------------|-------------------------------------------------------------------------------------|-----------------------|
| H1-2020     | 2            | June           | Certified origin  | Multifloral  | Galați              | Romania       | 2020            | Mechanical         | Semi-rural  | Near (~ 6.8 km distance) national highway (DN 25), with intense traffic of vehicles | <i>Apis mellifera</i> |
| H2-2021     | 3            | June           | Certified origin  | Linden       | Galați              | Romania       | 2021            | Manual             | Rural       | Near (~ 1.5 km distance) national highway (DN 25), with intense traffic of vehicles | <i>Apis mellifera</i> |
| H3-2021     | 1            | June           | Certified origin  | Acacia       | Galați              | Romania       | 2021            | Manual             | Rural       | Near (~ 3.1 km distance) national highway (DN 25), with intense traffic of vehicles | <i>Apis mellifera</i> |
| H4-2022     | 2            | June-July      | Raw artisan honey | Sunflower    | Târgu Bujor         | Romania       | 2022            | Mechanical         | Rural       | -                                                                                   | <i>Apis mellifera</i> |
| H5-2020     | 2            | June           | Certified origin  | Spring rape  | Tecuci              | Romania       | 2020            | Mechanical         | Semi-rural  | Near (~ 800 m distance) country road (DJ 251), with intense traffic of vehicles     | <i>Apis mellifera</i> |
| H6-2020     | 1            | May            | Certified origin  | Autumn rape  | Tecuci              | Romania       | 2020            | Mechanical         | Semi-rural  | Near (~ 1000 m distance) country road (DJ 251), with intense traffic of vehicles    | <i>Apis mellifera</i> |
| H7-2019     | 2            | June-July      | Raw artisan honey | Sunflower    | Vaslui              | Romania       | 2019            | Manual             | Rural       | Near (~ 6.5 km distance) national highway (DN 2F), with intense traffic of vehicles | <i>Apis mellifera</i> |
| H8-2018     | 2            | June           | Raw artisan honey | Linden       | Vaslui              | Romania       | 2018            | Manual             | Semi-rural  | Near (~ 6.5 km distance) national highway (DN 2F), with intense traffic of vehicles | <i>Apis mellifera</i> |
| H9-2019     | 3            | June           | Raw artisan honey | Lavender     | Vaslui              | Romania       | 2019            | Manual             | Rural       | -                                                                                   | <i>Apis mellifera</i> |
| H10-2021    | 3            | June           | Certified origin  | Multifloral  | Brăila              | Romania       | 2021            | Manual             | Rural       | Near (~ 12.0 km distance) European Road (E 87), with intense traffic of vehicles    | <i>Apis mellifera</i> |

|          |   |             |                   |                 |           |         |      |            |            |                                                                                  |                       |
|----------|---|-------------|-------------------|-----------------|-----------|---------|------|------------|------------|----------------------------------------------------------------------------------|-----------------------|
| H11-2021 | 1 | June        | Raw artisan honey | Linden          | Brăila    | Romania | 2022 | Manual     | Rural      | Near (~ 12.0 km distance) European Road (E 87), with intense traffic of vehicles | <i>Apis mellifera</i> |
| H12-2021 | 2 | June-August | Raw artisan honey | Acacia + Linden | Brăila    | Romania | 2021 | Manual     | Rural      | -                                                                                | <i>Apis mellifera</i> |
| H13-2021 | 1 | June-August | Raw artisan honey | Multifloral     | Brăila    | Romania | 2021 | Manual     | Rural      | -                                                                                | <i>Apis mellifera</i> |
| H14-2020 | 1 | May-June    | Certified origin  | Acacia          | Satu Mare | Romania | 2020 | Manual     | Rural      | -                                                                                | <i>Apis mellifera</i> |
| H15-2020 | 2 | June-August | Raw artisan honey | Multifloral     | Satu Mare | Romania | 2020 | Manual     | Rural      | -                                                                                | <i>Apis mellifera</i> |
| H16-2020 | 1 | June-August | Raw artisan honey | Multifloral     | Tulcea    | Romania | 2020 | Manual     | Rural      | -                                                                                | <i>Apis mellifera</i> |
| H17-2020 | 2 | June-August | Raw artisan honey | Sunflower       | Tulcea    | Romania | 2020 | Manual     | Rural      | -                                                                                | <i>Apis mellifera</i> |
| H18-2019 | 1 | June        | Raw artisan honey | Linden          | Tulcea    | Romania | 2019 | Manual     | Rural      | -                                                                                | <i>Apis mellifera</i> |
| H19-2021 | 2 | May-June    | Certified origin  | Honeydew        | Botoșani  | Romania | 2021 | Manual     | Semi-rural | -                                                                                | <i>Apis mellifera</i> |
| H20-2021 | 3 | June-August | Certified origin  | Multifloral     | Botoșani  | Romania | 2019 | Manual     | Semi-rural | -                                                                                | <i>Apis mellifera</i> |
| H21-2019 | 2 | June-August | Certified origin  | Linden          | Botoșani  | Romania | 2019 | Manual     | Semi-rural | -                                                                                | <i>Apis mellifera</i> |
| H22-2019 | 1 | June-August | Certified origin  | Sunflower       | Botoșani  | Romania | 2019 | Manual     | Semi-rural | -                                                                                | <i>Apis mellifera</i> |
| H23-2021 | 2 | July-August | Certified origin  | Acacia + Linden | Iași      | Romania | 2021 | Mechanical | Rural      | -                                                                                | <i>Apis mellifera</i> |



|          |   |           |                   |             |                |         |      |            |            |                                                                                     |                       |
|----------|---|-----------|-------------------|-------------|----------------|---------|------|------------|------------|-------------------------------------------------------------------------------------|-----------------------|
| H24-2020 | 2 | June      | Certified origin  | Acacia      | Iași           | Romania | 2020 | Mechanical | Rural      | -                                                                                   | <i>Apis mellifera</i> |
| H25-2020 | 2 | June      | Certified origin  | Sunflower   | Iași           | Romania | 2020 | Mechanical | Rural      | -                                                                                   | <i>Apis mellifera</i> |
| H26-2021 | 3 | May-June  | Raw artisan honey | Acacia      | Sibiu          | Romania | 2021 | Mechanical | Rural      | Near (~ 14.0 km distance) European Road (E 81), with intense traffic of vehicles    | <i>Apis mellifera</i> |
| H27-2020 | 2 | June-July | Raw artisan honey | Sunflower   | Sibiu          | Romania | 2020 | Mechanical | Rural      | Near (~ 14.0 km distance) European Road (E 81), with intense traffic of vehicles    | <i>Apis mellifera</i> |
| H28-2019 | 1 | June      | Certified origin  | Sunflower   | Râmnicu Vâlcea | Romania | 2019 | Manual     | Semi-rural | -                                                                                   | <i>Apis mellifera</i> |
| H29-2018 | 1 | June      | Certified origin  | Multifloral | Râmnicu Vâlcea | Romania | 2018 | Manual     | Semi-rural | -                                                                                   | <i>Apis mellifera</i> |
| H30-2018 | 2 | May-June  | Certified origin  | Acacia      | Arad           | Romania | 2018 | Manual     | Rural      | Near (~ 21.3 km distance) European Road (E 68), with intense traffic of vehicles    | <i>Apis mellifera</i> |
| H31-2020 | 3 | June      | Certified origin  | Sunflower   | Teleorman      | Romania | 2020 | Manual     | Rural      | -                                                                                   | <i>Apis mellifera</i> |
| H32-2021 | 2 | May-June  | Certified origin  | Acacia      | Mehedinți      | Romania | 2021 | Manual     | Rural      | Near (~ 7.5 km distance) national highway (DN 57), with intense traffic of vehicles | <i>Apis mellifera</i> |
| H33-2021 | 1 | June      | Certified origin  | Sunflower   | Mehedinți      | Romania | 2021 | Manual     | Rural      | Near (~ 7.5 km distance) national highway (DN 57), with intense traffic of vehicles | <i>Apis mellifera</i> |

**Table S5.** The program of the microwave oven Milestone START D Microwave Digestion System

| Step | Target Temp (°C) | Pressure Max. (psi) | Temperature Ramp (min.) | Hold Time (min.) | Power (%) |
|------|------------------|---------------------|-------------------------|------------------|-----------|
| 1.   | 220              | 800                 | 10                      | 20               | 100       |
| 2.   | 35-40            | 800                 | -                       | 45 min. cooling  | -         |

**Table S6.** Instrumental (a) and data acquisition (b) parameters of ICP-MS

| (a) Instrumental parameters               |             | (b) Data acquisition parameters for quantitative mode |                                                       |
|-------------------------------------------|-------------|-------------------------------------------------------|-------------------------------------------------------|
| RF power/W                                | 1.4 kW      | Measuring mode                                        | Standard (Ar 5.0)<br>Q Cell (Collision Cell) (He 6.0) |
| Argon (Ar) gas flow, Helium (He) gas flow |             | Point per peak                                        | 3                                                     |
| Nebulizer                                 | 1.0 L/min.  | Scans/Replicate                                       | 7                                                     |
| Plasma gas low rate (Ar 5.0)              | 18.0 L/min. | Replicate/Sample                                      | 7                                                     |
| Auxiliary gas flow rate (He 6.0)          | 0.20 L/min. |                                                       |                                                       |
| Lens voltage                              | 37 V        | Dwell time (ms)                                       | 3                                                     |
| Mirror lens right                         | 32 V        |                                                       |                                                       |
| Mirror lens bottom                        | 31 V        |                                                       |                                                       |
| Sample uptake rate                        | 90 s        | Integration time                                      | 1-5 ms                                                |
| Temperature spray chamber                 |             |                                                       | 2.10 °C                                               |
| Background correction                     |             |                                                       | 2 points/peak                                         |
| Injector tube                             |             |                                                       | quartz 2-mm id                                        |
| Sample cone                               |             |                                                       | Sample Cone 4450                                      |
| Skimmer cone                              |             |                                                       | Ni – Skimmer iCAP Q 0.5 mm insert version             |
| Nebulizer                                 |             |                                                       | MicroMist Nebulizer 0.4 mL/min.                       |

**Table S7.** Instrumental conditions for the determination of each element using ICP-MS technique.

| Element           | Correlation coefficient | LoD (µg/L) | LoQ (µg/L) | BEC (µg/L) | Element           | Correlation coefficient | LoD (µg/L) | LoQ (µg/L) | BEC (µg/L) |
|-------------------|-------------------------|------------|------------|------------|-------------------|-------------------------|------------|------------|------------|
| <sup>19</sup> K   | 0.9991                  | 2.847      | 7.321      | 31.733     | <sup>23</sup> Na  | 0.9996                  | 3.991      | 13.232     | 32.121     |
| <sup>24</sup> Mg  | 0.9999                  | 2.054      | 9.003      | 9.099      | <sup>43</sup> Ca  | 0.9995                  | 5.384      | 17.986     | 21.004     |
| <sup>7</sup> Li   | 0.9992                  | 0.005      | 0.032      | 0.020      | <sup>27</sup> Al  | 0.9992                  | 0.068      | 0.324      | 6.006      |
| <sup>56</sup> Fe  | 0.9999                  | 5.232      | 17.574     | 71.426     | <sup>64</sup> Cu  | 0.9997                  | 0.035      | 0.139      | 0.236      |
| <sup>65</sup> Zn  | 0.9999                  | 0.079      | 1.203      | 1.310      | <sup>88</sup> Sr  | 0.9997                  | 0.133      | 0.476      | 0.957      |
| <sup>9</sup> Be   | 0.9999                  | 0.006      | 0.020      | 0.015      | <sup>51</sup> V   | 0.9994                  | 1.208      | 4.042      | 4.263      |
| <sup>52</sup> Cr  | 0.9999                  | 1.607      | 5.533      | 0.637      | <sup>55</sup> Mn  | 0.9997                  | 0.012      | 0.039      | 0.087      |
| <sup>60</sup> Ni  | 0.9997                  | 0.045      | 0.181      | 0.096      | <sup>70</sup> Ga  | 0.9997                  | 0.013      | 0.041      | 0.041      |
| <sup>79</sup> Se  | 0.9998                  | 0.533      | 0.029      | 0.923      | <sup>85</sup> Rb  | 0.9996                  | 0.151      | 0.230      | 0.653      |
| <sup>204</sup> Tl | 0.9999                  | 0.002      | 0.017      | 0.003      | <sup>208</sup> Ag | 0.9993                  | 0.018      | 0.166      | 0.017      |
| <sup>209</sup> Bi | 0.9998                  | 0.009      | 0.030      | 0.002      | <sup>115</sup> In | 0.9997                  | 0.004      | 0.011      | 0.009      |
| <sup>133</sup> Cs | 0.9999                  | 0.006      | 0.021      | 0.015      | <sup>137</sup> Ba | 0.9998                  | 0.879      | 0.169      | 2.684      |
| <sup>75</sup> As  | 0.9999                  | 0.006      | 0.743      | 0.018      | <sup>111</sup> Cd | 0.9997                  | 0.007      | 0.069      | 0.0031     |
| <sup>201</sup> Hg | 0.9999                  | 0.043      | 0.137      | 0.128      | <sup>208</sup> Pb | 0.9996                  | 0.151      | 0.231      | 0.649      |
| <sup>238</sup> U  | 0.9999                  | 0.031      | 0.084      | 0.005      |                   |                         |            |            |            |

LoD = Detection limit; LoQ = Quantification limit; BEC = Background equivalent concentration.

**Table S8.** Validation parameters of the analytical procedure for the determination of each elements (honey)

| Element                                                   | Certified reference material analysis |                                      | Validation parameters |                 |
|-----------------------------------------------------------|---------------------------------------|--------------------------------------|-----------------------|-----------------|
|                                                           | The result declared by de manufacture | The results obtained in our research | Recovery (%)          | Uncertainty (%) |
| <sup>19</sup> K <sup>b</sup> (mg/kg)                      | 0.107 ± 0.008                         | 0.104 ± 0.001                        | 99.13                 | 20              |
| <sup>24</sup> Mg <sup>a</sup> (mg/kg)                     | 4320 ± 150                            | 4320 ± 132                           | 99.82                 | 16              |
| <sup>7</sup> Li (µg/L)                                    | -                                     | 0.028                                | 102.02                | 14              |
| <sup>56</sup> Fe <sup>b</sup> (mg/kg)                     | 46 ± 2                                | 45 ± 5                               | 106.02                | 12              |
| <sup>59</sup> Co <sup>d</sup> (mg/kg)                     | 0.5773 ± 0.071                        | 0.6541 ± 0.321                       | 107.18                | 24              |
| <sup>65</sup> Zn <sup>b</sup> (mg/kg)                     | 38 ± 2                                | 31.84 ± 0.86                         | 100.12                | 17              |
| <sup>9</sup> Be (µg/L)                                    | -                                     | 0.023                                | 99.04                 | 23              |
| <sup>52</sup> Cr <sup>a</sup> (mg/kg)<br>(not certified)  | 1.988 ± 0.034                         | 2.124 ± 0.070                        | 92.69                 | 21              |
| <sup>60</sup> Ni <sup>a</sup> (mg/kg)                     | 0.689 ± 0.095                         | 1.784 ± 0.084                        | 98.70                 | 18              |
| <sup>79</sup> Se <sup>d</sup> (mg/kg)                     | 0.0543 ± 0.0020                       | 0.0513 ± 0.0018                      | 105.22                | 14              |
| <sup>204</sup> Tl (µg/L)                                  | -                                     | 0.023                                | 99.85                 | 16              |
| <sup>209</sup> Bi (µg/L)                                  | -                                     | 0.014                                | 113.12                | 22              |
| <sup>133</sup> Cs <sup>d</sup> (mg/kg)<br>(not certified) | 0.053                                 | 0.046 ± 0.087                        | 98.98                 | 19              |
| <sup>75</sup> As <sup>a</sup> (mg/kg)                     | 0.062 ± 0.014                         | 0.1126 ± 0.062                       | 117.89                | 16              |
| <sup>201</sup> Hg <sup>b</sup> (mg/kg)                    | 0.0399 ± 0.0007                       | 0.023 ± 0.017                        | 95.84                 | 10              |
| <sup>238</sup> U <sup>d</sup> (mg/kg)<br>(not certified)  | 0.035                                 | 0.025 ± 0.001                        | 112.09                | 9               |
| <sup>23</sup> Na <sup>c</sup> mg/kg<br>(not certified)    | 24.4 ± 2.1                            | 23.4 ± 3.5                           | 98.99                 | 14              |
| <sup>43</sup> Ca <sup>b</sup> (mg/kg)                     | 0.25 ± 0.01                           | 0.26 ± 2.9                           | 111.87                | 13              |
| <sup>27</sup> Al <sup>b</sup> (mg/kg)                     | 580 ± 30                              | 567.89 ± 10                          | 99.98                 | 23              |
| <sup>64</sup> Cu <sup>b</sup> (mg/kg)                     | 2.8 ± 0.2                             | 4.42 ± 0.31                          | 96.87                 | 23              |
| <sup>88</sup> Sr <sup>a</sup> (mg/kg)                     | 53 ± 5.0                              | 51 ± 1.1                             | 110.21                | 13              |
| <sup>51</sup> V <sup>a</sup> (mg/kg)                      | 0.367 ± 0.038                         | 0.389 ± 0.024                        | 98.87                 | 16              |
| <sup>55</sup> Mn <sup>a</sup> (mg/kg)                     | 97.8 ± 1.8                            | 99.1 ± 2.4                           | 99.00                 | 22              |
| <sup>70</sup> Ga (µg/L)                                   | -                                     | 0.044                                | 99.89                 | 13              |
| <sup>85</sup> Rb <sup>b</sup> (mg/kg)                     | 16.5 ± 0.9                            | 15.3 ± 1.8                           | 111.01                | 20              |
| <sup>208</sup> Ag <sup>d</sup> (mg/kg)<br>(not certified) | 0.017                                 | 0.013 ± 0.001                        | 101.89                | 12              |
| <sup>115</sup> In (µg/L)                                  | -                                     | 0.009                                | 111.45                | 21              |
| <sup>137</sup> Ba <sup>b</sup> (mg/kg)                    | 6.0 ± 0.2                             | 5.98 ± 1.2                           | 98.97                 | 18              |
| <sup>111</sup> Cd <sup>b</sup> (mg/kg)                    | 0.233 ± 0.004                         | 1.687 ± 0.147                        | 90.32                 | 23              |
| <sup>208</sup> Pb <sup>a</sup> (mg/kg)                    | 0.869 ± 0.018                         | 0.164 ± 0.003                        | 96.78                 | 22              |

<sup>a</sup> NIST – 1547 Peach Leaves Standard Reference Materials; <sup>b</sup> NIST – 1575a Pine Needles (*Pinus taeda*) Standard Reference Materials; <sup>c</sup> NIST – 1515 Apples Leaves Standard Reference Materials; <sup>d</sup> NIST – 1573a Tomato Leves Standard Reference Materials.

**Table S9.** Quantitative expressions denoting the proportion of each individual elements in terms of percentage values (%).

| Element           | Percentage<br>Calculation % |
|-------------------|-----------------------------|
| <sup>19</sup> K   | 84.04                       |
| <sup>23</sup> Na  | 2.16                        |
| <sup>24</sup> Mg  | 3.86                        |
| <sup>43</sup> Ca  | 8.05                        |
| <sup>7</sup> Li   | 0.02                        |
| <sup>27</sup> Al  | 0                           |
| <sup>56</sup> Fe  | 1.52                        |
| <sup>64</sup> Cu  | 0.06                        |
| <sup>65</sup> Zn  | 0.07                        |
| <sup>88</sup> Sr  | 0.01                        |
| <sup>9</sup> Be   | 0                           |
| <sup>51</sup> V   | 0                           |
| <sup>52</sup> Cr  | 0.06                        |
| <sup>55</sup> Mn  | 0.15                        |
| <sup>59</sup> Co  | 0                           |
| <sup>60</sup> Ni  | 0.01                        |
| <sup>70</sup> Ga  | 0                           |
| <sup>79</sup> Se  | 0                           |
| <sup>85</sup> Rb  | 0                           |
| <sup>204</sup> Tl | 0                           |
| <sup>208</sup> Ag | 0                           |
| <sup>209</sup> Bi | 0                           |
| <sup>115</sup> In | 0                           |
| <sup>133</sup> Cs | 0                           |
| <sup>137</sup> Ba | 0                           |
| <sup>75</sup> As  | 0                           |
| <sup>111</sup> Cd | 0.03                        |
| <sup>201</sup> Hg | 0                           |
| <sup>208</sup> Pb | 0.09                        |
| <sup>238</sup> U  | 0                           |
| Σ                 | 100                         |
